# Supplementary material
Source: publisher figshare collection journal article supplement (https://rs.figshare.com/ndownloader/files/17842823)
Supplement: Supplementary file 1 [file 17842823]

50	0.4	0.4	1	1	0.03	0.04	0.4	0.2	10	1	1367.6	0.02007
50	0.2	0.2	1	1	0.03	0.04	0.4	0	10	1	1059.5	0.01978
50	0.4	0.4	1	1	0.03	0.04	0.4	0.3	10	1	1381.7	0.02037
50	0.2	0.3	1	1	0.03	0.04	0.4	0	10	1	1121	0.01955
50	0.3	0.3	1	1	0.03	0.04	0.4	0	10	1	1198.5	0.01991
50	0.4	0.4	1	1	0.03	0.04	0.4	0.1	10	1	1381.1	0.0204
50	0.4	0.5	1	1	0.03	0.04	0.4	0.1	10	1	1513	0.02054
50	0.4	0.5	1	1	0.03	0.04	0.4	0.3	10	1	1441.5	0.01889
50	0.6	0.6	1	1	0.03	0.04	0.4	0.6	10	1	1894.1	0.01983
50	0.6	0.7	1	1	0.03	0.04	0.4	0.6	10	1	2161.7	0.02009
50	0.4	0.6	1	1	0.03	0.04	0.4	0.3	10	1	1588.3	0.01898
50	0.4	0.3	1	1	0.03	0.04	0.4	0.1	10	1	1280	0.02039
50	0.5	0.3	1	1	0.03	0.04	0.4	0.1	10	1	1359.7	0.02001
50	0.4	0.5	1	1	0.03	0.04	0.4	0.2	10	1	1480.1	0.0197
50	0.5	0.4	1	1	0.03	0.04	0.4	0.1	10	1	1445.1	0.01931
50	0.6	0.6	1	1	0.03	0.04	0.4	0.8	10	1	1938.2	0.02007
50	0.6	0.4	1	1	0.03	0.04	0.4	0.3	10	1	1600.8	0.02093
50	0.5	0.5	1	1	0.03	0.04	0.4	0.2	10	1	1601.9	0.0196
50	0.5	0.6	1	1	0.03	0.04	0.4	0.3	10	1	1767.4	0.02079
50	0.5	0.5	1	1	0.03	0.04	0.4	0.1	10	1	1561.8	0.01913
50	0.6	0.6	1	1	0.03	0.04	0.4	0.3	10	1	1986.7	0.02071
50	0.5	0.7	1	1	0.03	0.04	0.4	0.4	10	1	2013.9	0.02201
50	0.7	0.6	1	1	0.03	0.04	0.4	0.8	10	1	2241.8	0.0221
50	0.7	0.7	1	1	0.03	0.04	0.4	0.8	10	1	2442.6	0.01973
50	0.6	0.5	1	1	0.03	0.04	0.4	0.3	10	1	1729.5	0.01878
50	0.6	0.7	1	1	0.03	0.04	0.4	0.4	10	1	2230.1	0.02252
50	0.7	0.7	1	1	0.03	0.04	0.4	0.6	10	1	2484.4	0.01984
50	0.7	0.8	1	1	0.03	0.04	0.4	0.9	10	1	2880.1	0.02092
50	0.7	0.6	1	1	0.03	0.04	0.4	0.6	10	1	2176.4	0.02031
50	0.7	0.7	1	1	0.03	0.04	0.4	0.9	10	1	2408.5	0.01964
50	0.8	0.7	1	1	0.03	0.04	0.4	0.9	10	1	2855.3	0.01938
50	0.3	0.3	1	1	0.03	0.04	0.4	0.1	10	1	1185.3	0.02032
50	0.4	0.3	1	1	0.03	0.04	0.4	0.2	10	1	1296.8	0.02153
50	0.3	0.3	1	1	0.03	0.04	0.4	0.2	10	1	1184.2	0.01989
50	0.3	0.5	1	1	0.03	0.04	0.4	0.2	10	1	1339.8	0.01835
50	0.3	0.4	1	1	0.03	0.04	0.4	0.2	10	1	1250.9	0.01827
50	0.3	0.2	1	1	0.03	0.04	0.4	0	10	1	1113.8	0.02041
50	0.3	0.4	1	1	0.03	0.04	0.4	0.1	10	1	1286.9	0.02019
50	0.3	0.5	1	1	0.03	0.04	0.4	0.1	10	1	1372.8	0.02102
50	0.5	0.3	1	1	0.03	0.04	0.4	0.2	10	1	1372.1	0.02164
50	0.5	0.4	1	1	0.03	0.04	0.4	0.2	10	1	1478.2	0.01999
50	0.6	0.5	1	1	0.03	0.04	0.4	0.5	10	1	1741.4	0.0203
50	0.5	0.5	1	1	0.03	0.04	0.4	0.5	10	1	1636.1	0.02004
50	0.6	0.6	1	1	0.03	0.04	0.4	0.5	10	1	1924.8	0.01942
50	0.5	0.7	1	1	0.03	0.04	0.4	0.5	10	1	1898.7	0.01991
50	0.5	0.6	1	1	0.03	0.04	0.4	0.5	10	1	1685.9	0.01838
50	0.5	0.5	1	1	0.03	0.04	0.4	0.4	10	1	1596.6	0.02001
50	0.7	0.5	1	1	0.03	0.04	0.4	0.5	10	1	1870.2	0.01992
50	0.5	0.6	1	1	0.03	0.04	0.4	0.4	10	1	1751.2	0.01933
50	0.6	0.6	1	1	0.03	0.04	0.4	0.7	10	1	1947.2	0.01986
50	0.8	0.8	1	1	0.03	0.04	0.4	0.9	10	1	3556.1	0.02036
50	0.7	0.5	1	1	0.03	0.04	0.4	0.4	10	1	1834.4	0.01859
50	0.6	0.7	1	1	0.03	0.04	0.4	0.5	10	1	2187.7	0.01975
50	0.6	0.7	1	1	0.03	0.04	0.4	0.7	10	1	2154.4	0.01878
50	0.7	0.6	1	1	0.03	0.04	0.4	0.5	10	1	2142.7	0.01878
50	0.6	0.7	1	1	0.03	0.04	0.4	0.8	10	1	2124.5	0.01864
50	0.6	0.5	1	1	0.03	0.04	0.4	0.4	10	1	1788.5	0.02086
50	0.6	0.6	1	1	0.03	0.04	0.4	0.4	10	1	1962	0.02051
50	0.7	0.6	1	1	0.03	0.04	0.4	0.7	10	1	2184.5	0.01948
50	0.7	0.7	1	1	0.03	0.04	0.4	0.7	10	1	2508.6	0.02048
50	0.5	0.5	1	1	0.03	0.04	0.4	0.3	10	1	1614.9	0.02039
50	0.5	0.4	1	1	0.03	0.04	0.4	0.3	10	1	1475.5	0.02042
50	0.7	0.7	1	1	0.03	0.04	0.4	0.5	10	1	2505.4	0.0204
50	0.7	0.6	1	1	0.03	0.04	0.4	0.4	10	1	2101.6	0.01882
50	0.7	0.7	1	1	0.03	0.04	0.4	0.4	10	1	2482	0.02042
